# Supplementary material for: Redundant and specific roles of cohesin STAG subunits in chromatin looping and transcriptional control
Source: PubMed Central journal article supplement — Genome Res. 2020 Apr;30(4):515–27. doi: 10.1101/gr.253211.119 (PMC7197483; doi:10.1101/gr.253211.119), 2020-04
Supplement: supp_gr.253211.119_Supplemental_movie_legend.pdf [file supp_gr.253211.119_Supplemental_movie_legend.pdf]

**Supplemental movie:**

Blinking behavior of the different dyes in a triple color dSTORM experiment.

Human skin fibroblasts were immunostained with the following antibody/secondary antibody combinations: goat-anti-STAG1 and donkey-anti-goat Alexa488, mouse-anti-CTCF and donkey-anti-mouse CF568, rabbit-anti-STAG2 and donkey-anti-rabbit Alexa647. We show 1000 frames taken from halfway the total movie of 12000 frames, where blinking is optimal.
