# Supplementary material for: Redundant and specific roles of cohesin STAG subunits in chromatin looping and transcriptional control
Source: PubMed Central journal article supplement — Genome Res. 2020 Apr;30(4):515–27. doi: 10.1101/gr.253211.119 (PMC7197483; doi:10.1101/gr.253211.119), 2020-04
Supplement: supp_gr.253211.119_Supplemental_tables.pdf [file supp_gr.253211.119_Supplemental_tables.pdf]

Table S1

## Antibodies

| Target                   | Source                          | Use                       | Referred to                              |
|--------------------------|---------------------------------|---------------------------|------------------------------------------|
| $\alpha$ -GFP            | #11814460001, Roche             | WB, IP/WB                 | Fig. 1, Fig. S1                          |
| $\alpha$ -EGFP           | Homemade rabbit antibody        | ChIP-seq, ChIP-qPCR, IF   | Fig. 1, Fig. 2, Fig. 3, Fig. S2, Fig. S3 |
| $\alpha$ -STAG1          | Homemade rabbit antibody        | One-Day ChIP Kit, Re-ChIP | Fig. 3; Fig. S3                          |
| $\alpha$ -STAG1          | #A300-156A, Bethyl Laboratories | WB                        | Fig. 1; Fig. S1; Fig. S12                |
| $\alpha$ -STAG2          | Homemade rabbit antibody        | One-Day ChIP kit, Re-ChIP | Fig. S3                                  |
| $\alpha$ -STAG2          | #A300-055A, Bethyl Laboratories | WB                        | Fig. 1; Fig. S1; Fig. S12                |
| $\alpha$ -SMC1A          | Niels Galjart                   | IP/WB                     | Fig. 1; Fig. S1                          |
| $\alpha$ -SMC1A          | #A300-055A, Bethyl Laboratories | WB                        | Fig. S12                                 |
| $\alpha$ -SMC3           | Homemade rabbit antibody        | IP, ChIP-qPCR, Re-ChIP    | Fig. 1, Fig. 2; Fig. 3; Fig. S1; Fig. S3 |
| Rabbit IgG               | #C15410206, Diagenode           | One-Day ChIP Kit, Re-ChIP | Fig. 3; Fig. S3                          |
| Rabbit IgG               | #500-P00-500 $\mu$ g, Peprotech | IP, ChIP-qPCR             | Fig. 1, Fig. 2, Fig. S1, Fig. S3         |
| $\alpha$ -Tubulin (TUBB) | #T8328, Sigma                   | WB                        | Fig. 1, Fig. S1, Fig. S7, Fig. S12       |
| $\alpha$ -SA1            | Abcam ab4457                    | dSTORM                    | Fig. 3, Fig. S7                          |
| $\alpha$ -SA2            | Bethyl A302-580A                | dSTORM                    | Fig. 3, Fig. S7                          |
| $\alpha$ -CTCF           | BD 612148                       | dSTORM, WB                | Fig. 3, Fig. S7                          |
| Anti-Topoisomerase II    | MAB4197, Merck                  | WB                        | Fig. S7                                  |

Table S2

## ChIP-qPCR primers

| Forward (F)               |                              | Reverse (R)               |                                  | Fig:           |
|---------------------------|------------------------------|---------------------------|----------------------------------|----------------|
| H19/IGF2_R1-F             | TGTGGATAATGCCCGACCTGAAGATCTG | H19/IGF2_R1-R             | ACGGAATTGGTTGTAGTTGTGGAATCGGAAGT | Fig.1          |
| H19/IGF2_R2-F             | TTCAGCCGGTTCAAGGGACG         | H19/IGF2_R2-R             | CTAGGGAGGAGGACAGAGGCAAGAG        | Fig.1          |
| Neg. Target-F             | GCTGCTGTTCCGCCATTCAATTC      | Neg. Target-R             | GCTGATACCAACCACCAATCCATGAG       | Fig.1, 3       |
| PAGE2B/FAM104B locus_R1-F | CCAAGTACTGGTCTTTCAATGT       | PAGE2B/FAM104B locus_R1-R | GTCATACAGCAGTGAATGGA             | Fig.2, Fig. S3 |
| PAGE2B/FAM104B locus_R2-F | GATGGTTTCTTCTCATTATCTCCA     | PAGE2B/FAM104B locus_R2-R | CACCCACTCTGAAAGTGGAT             | Fig.2, Fig. S3 |
| PAGE2B/FAM104B locus_R3-F | CACTGTACCTGCAGGTCAT          | PAGE2B/FAM104B locus_R3-R | GTCCCCACGGTCATCACGCT             | Fig.2, Fig. S3 |
| LY86-AS1/LY86 locus_R1-F  | CTCAGTGTCTCTGAGGTACA         | LY86-AS1/LY86 locus_R1-R  | TCACCTAGCCAGAGGTGTGA             | Fig.S3         |
| LY86-AS1/LY86 locus_R2-F  | GATTCAGGTCAGGCTTTCCCA        | LY86-AS1/LY86 locus_R2-R  | CAGAGCTGGCTTCAGGAACA             | Fig.S3         |
| LY86-AS1/LY86 locus_R3-F  | CCAGCCAGGAGGCCACTA           | LY86-AS1/LY86 locus_R3-R  | GCAGTTTGATAAGTTGTGTGGAA          | Fig.S3         |
| LY86-AS1/LY86 locus_R4-F  | GCCACACAGAACTTCAGAA          | LY86-AS1/LY86 locus_R4-R  | CAGGAAGCGTCCGCAGGA               | Fig.S3         |
| LY86-AS1/LY86 locus_R5-F  | CCAAGATTGGACCATGTTTGA        | LY86-AS1/LY86 locus_R5-R  | CAAGAAAGTGGGCTTTGTCTCT           | Fig.S3         |
| ICOS locus_R1-F           | CTATGGGGCCAGTTCATGATT        | ICOS locus_R1-R           | TCCCAAGATTCCTTCACTCA             | Fig.S3         |
| ICOS locus_R2-F           | TATCCAGGCAGACTGAATTG         | ICOS locus_R2-R           | CCTTTCTAGGGATGGGGTGT             | Fig.S3         |
| P1_SA1/SA2-F              | TGTGGATAATGCCCGACCTGAAGATCTG | P1_SA1/SA2-R              | ACGGAATTGGTTGTAGTTGTGGAATCGGAAGT | Fig.S3         |
| P2_SA1/SA2-F              | TTCAGCCGGTTCAAGGGACG         | P2_SA1/SA2-R              | CTAGGGAGGAGGACAGAGGCAAGAG        | Fig.S3         |
| P3_SA1/SA2-F              | TGAGTTCCTCTTAGCTCCAA         | P3_SA1/SA2-R              | TGCATACTGCAGGTGCAAGCA            | Fig.S3         |
| P4_SA1/SA2-F              | CCAAGTACTGGTCTTTCAATGT       | P4_SA1/SA2-R              | GTCATACAGCAGTGAATGGA             | Fig.S3         |
| P5_SA1/SA2-F              | TAGCCGCTGTAAGGAGAA           | P5_SA1/SA2-R              | GTGCTCTGCTCATCTCTGGA             | Fig.S3         |
| P6_SA1/SA2-F              | GCCACACAGAACTTCAGAA          | P6_SA1/SA2-R              | CAGGAAGCGTCCGCAGGA               | Fig.S3         |
| P7_SA1/SA2-F              | GATTCAGGTCAGGCTTTCCCA        | P7_SA1/SA2-R              | CAGAGCTGGCTTCAGGAACA             | Fig.S3         |
| P8_SA1/SA2-F              | GGTCACAATACATACATGGGCTA      | P8_SA1/SA2-R              | CAGAGCCGAATGTAGGTCATAAA          | Fig.S3         |
| P1_SA2-F                  | AGGTGCCACTGTATGGAAG          | P1_SA2-R                  | CGCCAGCATACTGTAGTGA              | Fig.S3         |
| P2_SA2-F                  | CCCCTGTGACTTCTCACT           | P2_SA2-R                  | TTGAACCTAATGCAATCACTTG           | Fig.S3         |
| P3_SA2-F                  | CACTGTACCTGCAGGTCAT          | P3_SA2-R                  | GTCCCCACGGTCATCACGCT             | Fig.S3         |
| P4_SA2-F                  | TATCCAGGCAGACTGAATTG         | P4_SA2-R                  | CCTTTCTAGGGATGGGGTGT             | Fig.S3         |
| P5_SA2-F                  | AGGAGGGCAGTGAAGCAGT          | P5_SA2-R                  | GCTGTGAGCCTTTCCTGAAG             | Fig.S3         |
| P6_SA2-F                  | CCCCAGAGATGGGTTTTCTG         | P6_SA2-R                  | CTTGCTGTGGGTTTTGT                | Fig.S3         |
| P7_SA2-F                  | TCATCTCCCCAGTTCCTGAC         | P7_SA2-R                  | ACACTCTCATGTCCGCCTTC             | Fig.S3         |
| P8_SA2-F                  | TTGAAAATCGTGCTCAGAA          | P8_SA2-R                  | AATGGCCACACTTGGATGAG             | Fig.S3         |
| P1_SA1-F                  | GGAATGGCTGTTGTAATGTACA       | P1_SA1-R                  | TCTGTGTAATGTGACTTCTCT            | Fig.S3         |
| P2_SA1-F                  | AACTCCAGTTATTACATGAATAGA     | P2_SA1-R                  | AGCATTTTGTGGTCCGAGCA             | Fig.S3         |
| P3_SA1-F                  | GGGAATTGGCACAGGACTT          | P3_SA1-R                  | GGGCTGAGCTAAACCATGTA             | Fig.S3         |
| P4_SA1-F                  | CCAGCCAGGAGGCCACTA           | P4_SA1-R                  | GCAGTTTGATAAGTTGTGTGGAA          | Fig.S3         |
| P5_SA1-F                  | ATGCCTAATGCATAATGTCAGAA      | P5_SA1-R                  | CAGGAGGCGGTAAGAGTCTT             | Fig.S3         |
| P6_SA1-F                  | CTCCAGTGTGTGTCACCA           | P6_SA1-R                  | GAGCTTGGCAGTAGCAGGT              | Fig.S3         |
| P7_SA1-F                  | CAGATAACTGAATGTTCTCCTTA      | P7_SA1-R                  | GTGTACTGCCTGGAGTGGAT             | Fig.S3         |
| P8_SA1-F                  | TCCAGGTTAGTTGGTCGTATG        | P8_SA1-R                  | TGGTTCACGCTGTAATTGA              | Fig.S3         |
| ReChIP_neg                | GCTGCTGTTCCGCCATTCAATTC      | ReChIP_neg                | GCTGATACCAACCACCAATCCATGAG       | Fig. 3         |
| ReChIP_1_F                | AGGCACCTTAGCCAATG            | ReChIP_1_R                | CTGTATGCGACTCTGTGAC              | Fig. 3         |
| ReChIP_2_F                | TGATAAGGAACGCTGAAAACAGCCT    | ReChIP_2_R                | ACAGCTCTTCTGAGAAAGTGCCA          | Fig. 3         |
| ReChIP_3_F                | CACTGTACCTGCAGGTCAT          | ReChIP_3_R                | GTCCCCACGGTCATCACGCT             | Fig. 3         |
| ReChIP_4_F                | TAGCCGCTGTAAGGAGAA           | ReChIP_4_R                | GTGCTCTGCTCATCTCTGGA             | Fig. 3         |
| ReChIP_5_F                | GATGGTTTCTTCTCATTATCTCCA     | ReChIP_5_R                | CACCCACTCTGAAAGTGGAT             | Fig. 3         |
| Re_ChIP_6_F               | CCAAGTACTGGTCTTTCAATGT       | Re_ChIP_6_R               | GTCATACAGCAGTGAATGGA             | Fig. 3         |
| Re_ChIP_7_F               | CTATGGGGCCAGTTCATGATT        | Re_ChIP_7_R               | TCCCAAGATTCCTTCACTCA             | Fig. 3         |
| Re_ChIP_8_F               | GGTCACAATACATACATGGGCTA      | Re_ChIP_8_R               | CAGAGCCGAATGTAGGTCATAAA          | Fig. 3         |
| Re_ChIP_9_F               | GCCACACAGAACTTCAGAA          | Re_ChIP_9_R               | CAGGAAGCGTCCGCAGGA               | Fig. 3         |
| Re_ChIP_10_F              | GATTCAGGTCAGGCTTTCCCA        | Re_ChIP_10_R              | CAGAGCTGGCTTCAGGAACA             | Fig. 3         |

Table S3

## RT-qPCR primers

| Forward (F) |                          | Reverse (R) |                          | Referred to:             |
|-------------|--------------------------|-------------|--------------------------|--------------------------|
| STC2-F      | TACCTCAAGCACGACCTGTG     | STC2-R      | CCCAGTTCTGCTCACACTGA     | Fig. 5                   |
| KDM3A-F     | CTGGGCCCAAGATGTATAA      | KDM3A-R     | TCGTCAGAATCTCCATCTTGG    | Fig. 5                   |
| SNAPIN-F    | AGCTCGACTCTCACGTACAC     | SNAPIN-R    | GCCGGGCATTAAGTAGCTTC     | Fig. 5, Fig. 6, Fig. S12 |
| DUSP4-F     | CACAGAGCCCTTGACCT        | DUSP4-R     | CACTGCCGAGGTAGAGGAAG     | Fig. 5                   |
| BNIP3L-F    | GCAGGGACCATAGCTCTCAG     | BNIP3L-R    | TACCCAGTCCGCACTTTTCT     | Fig. 5                   |
| FUS-F       | GCCTAGCTATGGTGGACAGC     | FUS-R       | CCACCACCACTACTCATGGA     | Fig. 5                   |
| CAV1-F      | GAGCTGAGCGAGAAGCAAGT     | CAV1-R      | CAAATGCCGTCAAACCTGTG     | Fig. 5                   |
| NR4A2-F     | GGGCTGCAAAGGCTTCTTTA     | NR4A2-R     | CGGCAGTACTGACAGCGATT     | Fig. 5                   |
| TGM2-F      | CAACCTGGAGCCTTCTCTG      | TGM2-R      | CCGTAAGGCAGTCACGGTAT     | Fig. 5                   |
| AMOTL2-F    | GGCAAGCAAGACACAGGAG      | AMOTL2-R    | CAGCTTCTCTTGCTCCTGCT     | Fig. 5                   |
| CDK6-F      | TCGTGGAAGTTCAGATGTTGA    | CDK6-R      | CTCAATTGGTTGGGCAGATT     | Fig. 6                   |
| IL6ST-F     | GCCTGTTTGCTTAGCATTCC     | IL6ST-R     | CAGTGAAATTGCCATCTGAA     | Fig. 6                   |
| AXL-F       | TGGCTGTGAAGACGATGAAG     | AXL-R       | AGACCGCTTCACTCAGGAAA     | Fig. 6                   |
| GAL-F       | CAGGTCATTCAGCGACAAGA     | GAL-R       | TGATTGTGCGCATGATATTG     | Fig. 6                   |
| ADAM19-F    | GTAACAACCCCTGCTGCAAT     | ADAM19-R    | GGAGACTTGCCCGTACAGAA     | Fig. 6                   |
| STAG1-F     | ATGCAGAATGCAGAAATCATCAGA | STAG1-R     | TCATCATAAATTATGCTATACTGA | Fig. S12                 |
| STAG2-F     | TTGCCACCATCAAAGAACAGAC   | STAG2-R     | TGCACTTGATCTTGGTAAGC     | Fig. S12                 |
| SMC1A-F     | ATCAAGCGCCTTTACCCTGGCT   | SMC1A-R     | CTGTCTTCTCCGAGTCCACAAT   | Fig. S12                 |

Table S4

**Differentially expressed genes after STAG1 degradation (FDR < 0,05; log2 FC >0,6)**  
(Genes annotated in **bold red** are genes that respond to auxin (Rao et al., Cell, 2017))

| Gene name         | baseMean   | log2FoldChange | pvalue      | ENS Gene        |
|-------------------|------------|----------------|-------------|-----------------|
| STC2              | 1553.04307 | 0.429846247    | 3.63534E-05 | ENSG00000113739 |
| <b>AC007238.1</b> | 238.304234 | -0.223850444   | 0.03946788  | ENSG00000231043 |
| <b>AC013248.2</b> | 660.858416 | -0.232946589   | 0.035302666 | ENSG00000230897 |
| <b>AC015712.2</b> | 384.229879 | 0.488001244    | 1.32694E-05 | ENSG00000259583 |
| <b>AC026366.1</b> | 2413.79956 | -0.282700822   | 0.005533248 | ENSG00000240342 |
| <b>AC074033.1</b> | 253.40146  | -0.274798627   | 0.012235553 | ENSG00000213178 |
| <b>AC091167.1</b> | 140.066563 | -0.205942115   | 0.040986763 | ENSG00000225193 |
| <b>AC136632.1</b> | 457.307896 | -0.270154174   | 0.015947765 | ENSG00000218227 |
| ADAM19            | 2129.74826 | 0.369498689    | 0.000382867 | ENSG00000135074 |
| ADGRF1            | 120.730402 | 0.213286137    | 0.021349738 | ENSG00000153292 |
| ADIRF-AS1         | 228.131195 | 0.309592231    | 0.004376332 | ENSG00000272734 |
| ADORA2B           | 1282.01441 | 0.277295599    | 0.008307564 | ENSG00000170425 |
| <b>AHRR</b>       | 650.355628 | 0.676510312    | 0.000000001 | ENSG00000063438 |
| AKAP12            | 101645.75  | 0.247627334    | 0.005230597 | ENSG00000131016 |
| <b>AL009174.1</b> | 35.5021956 | -0.216570546   | 0.000969204 | ENSG00000227008 |
| <b>ALDH1A3</b>    | 5522.92639 | 0.720718461    | 1.68579E-14 | ENSG00000184254 |
| ANXA2P2           | 632.621689 | 0.22631971     | 0.005339164 | ENSG00000231991 |
| AQP3              | 281.644987 | 0.254042966    | 0.021620495 | ENSG00000165272 |
| ARL4D             | 288.551225 | 0.226624299    | 0.039159652 | ENSG00000175906 |
| ARSG              | 260.940284 | 0.229507993    | 0.036831332 | ENSG00000141337 |
| ATP11A            | 2243.80931 | 0.205816791    | 0.045838606 | ENSG00000068650 |
| ATP5J             | 1763.87771 | -0.229295088   | 0.025785912 | ENSG00000154723 |
| ATP9A             | 1392.45901 | 0.295727884    | 0.004933776 | ENSG00000054793 |
| <b>BHLHE40</b>    | 1011.55291 | 0.269191215    | 0.012712364 | ENSG00000134107 |
| <b>BNIP3L</b>     | 217.125089 | 0.291630964    | 0.00686662  | ENSG00000104765 |
| <b>BUB1B</b>      | 1060.68306 | -0.224271385   | 0.03684633  | ENSG00000156970 |
| <b>C1orf116</b>   | 237.116115 | 0.253547394    | 0.020110651 | ENSG00000182795 |
| <b>CAPN5</b>      | 235.076964 | 0.225168047    | 0.038939534 | ENSG00000149260 |
| <b>CAV1</b>       | 3774.08524 | -0.260436934   | 0.006888418 | ENSG00000105974 |
| <b>CBWD2</b>      | 134.72796  | 0.203641035    | 0.036820121 | ENSG00000136682 |
| <b>CCNA2</b>      | 807.479729 | -0.22992282    | 0.036447375 | ENSG00000145386 |
| <b>CD109</b>      | 3053.91097 | 0.267953966    | 0.008764745 | ENSG00000156535 |
| <b>CD59</b>       | 3938.52459 | 0.194168898    | 0.041691076 | ENSG00000085063 |
| <b>CDCA5</b>      | 2176.02297 | -0.206312446   | 0.043041166 | ENSG00000146670 |
| <b>CDK1</b>       | 1335.46082 | -0.235500243   | 0.027427664 | ENSG00000170312 |
| <b>CDK6</b>       | 2650.48925 | 0.302153586    | 0.003364328 | ENSG00000105810 |
| <b>COX7C</b>      | 2986.04004 | -0.240004655   | 0.013983887 | ENSG00000127184 |
| <b>CPA4</b>       | 9395.53881 | 0.254305472    | 0.006808085 | ENSG00000128510 |
| <b>CREB3L2</b>    | 1429.33861 | 0.21677937     | 0.037242233 | ENSG00000182158 |
| <b>CRY1</b>       | 255.342622 | 0.226608196    | 0.038693403 | ENSG00000008405 |
| <b>CRY2</b>       | 357.077891 | 0.235191803    | 0.035536866 | ENSG00000121671 |
| <b>CTNNA1</b>     | 9617.15462 | 0.221571227    | 0.015120528 | ENSG00000044115 |
| <b>CTNNAL1</b>    | 1821.80906 | -0.223999278   | 0.028853176 | ENSG00000119326 |
| <b>CYP1A1</b>     | 254.743646 | 0.923728579    | 3.52374E-17 | ENSG00000140465 |

|                  |            |              |             |                 |
|------------------|------------|--------------|-------------|-----------------|
| <b>CYP1B1</b>    | 103.303218 | 0.399898714  | 1.40768E-05 | ENSG00000138061 |
| <b>DAGLB</b>     | 745.352963 | 0.226636061  | 0.039059288 | ENSG00000164535 |
| <b>DDX39A</b>    | 1931.44745 | -0.214456134 | 0.038801073 | ENSG00000123136 |
| <b>DHRS3</b>     | 638.345269 | 0.291366772  | 0.008778444 | ENSG00000162496 |
| <b>DUSP4</b>     | 3871.47077 | 0.326901128  | 0.000637067 | ENSG00000120875 |
| <b>EEF1A1</b>    | 21324.5176 | 0.240528981  | 0.008221504 | ENSG00000156508 |
| <b>EGFR</b>      | 2811.33006 | 0.24131266   | 0.016826998 | ENSG00000146648 |
| <b>EREG</b>      | 6478.90214 | 0.283980333  | 0.002192839 | ENSG00000124882 |
| <b>ERRFI1</b>    | 10561.4611 | 0.214644763  | 0.022594264 | ENSG00000116285 |
| <b>ESPL1</b>     | 959.217933 | -0.234742213 | 0.029695875 | ENSG00000135476 |
| <b>EXOSC9</b>    | 1506.97899 | -0.21540063  | 0.037526859 | ENSG00000123737 |
| <b>FANCG</b>     | 1139.51958 | -0.225326265 | 0.0370216   | ENSG00000221829 |
| <b>FGF9</b>      | 152.1991   | 0.28080702   | 0.00473005  | ENSG00000102678 |
| <b>FUCA1</b>     | 727.491446 | 0.331438148  | 0.00270783  | ENSG00000179163 |
| <b>FUS</b>       | 6839.05855 | -0.325230148 | 0.000470144 | ENSG00000089280 |
| <b>GAL</b>       | 939.272138 | -0.231878265 | 0.031874768 | ENSG00000069482 |
| <b>GALNT5</b>    | 3457.58473 | 0.277505524  | 0.006203653 | ENSG00000136542 |
| <b>GAPDHP65</b>  | 1026.85298 | -0.228233955 | 0.033629145 | ENSG00000235587 |
| <b>GDA</b>       | 1632.64285 | 0.453899985  | 0.000015009 | ENSG00000119125 |
| <b>GDF15</b>     | 6593.3238  | 0.474156977  | 3.53918E-07 | ENSG00000130513 |
| <b>GLI2</b>      | 320.286431 | 0.239688862  | 0.029756323 | ENSG00000074047 |
| <b>GNG12</b>     | 1305.50407 | 0.208833409  | 0.049899282 | ENSG00000172380 |
| <b>GPRC5A</b>    | 14470.1639 | 0.365431032  | 6.65725E-05 | ENSG00000013588 |
| <b>H1FO</b>      | 7472.14175 | 0.279836254  | 0.002932592 | ENSG00000189060 |
| <b>HAS3</b>      | 2656.83242 | 0.908781683  | 2.6989E-20  | ENSG00000103044 |
| <b>HBE1</b>      | 1072.38293 | 0.244966296  | 0.022016039 | ENSG00000213931 |
| <b>HECW2</b>     | 137.684504 | 0.200967766  | 0.045804615 | ENSG00000138411 |
| <b>HIPK2</b>     | 2734.67007 | 0.358507202  | 0.00026019  | ENSG00000064393 |
| <b>HMGB1</b>     | 1479.49622 | -0.232494592 | 0.025781286 | ENSG00000189403 |
| <b>HNRNPD</b>    | 5092.84814 | -0.207774607 | 0.028469751 | ENSG00000138668 |
| <b>HPCAL1</b>    | 1969.60217 | 0.442399889  | 1.42505E-05 | ENSG00000115756 |
| <b>HSPB1</b>     | 3767.12015 | -0.219196259 | 0.022266624 | ENSG00000106211 |
| <b>IRF2BPL</b>   | 1436.32805 | 0.2556335    | 0.014416818 | ENSG00000119669 |
| <b>ITGB5</b>     | 1794.47167 | 0.222310303  | 0.029623772 | ENSG00000082781 |
| <b>ITPR1</b>     | 231.734143 | 0.220305252  | 0.042875571 | ENSG00000150995 |
| <b>KHNYN</b>     | 1328.74673 | 0.209633771  | 0.045917647 | ENSG00000100441 |
| <b>KIAA1683</b>  | 229.589509 | 0.285833318  | 0.008592335 | ENSG00000130518 |
| <b>KNTC1</b>     | 1006.85372 | -0.250433006 | 0.020692262 | ENSG00000184445 |
| <b>KRT15</b>     | 917.824711 | 0.256939684  | 0.018128166 | ENSG00000171346 |
| <b>LAMC2</b>     | 1240.74127 | 0.262490347  | 0.012909499 | ENSG00000058085 |
| <b>LDHAP5</b>    | 299.224978 | -0.220346573 | 0.046475284 | ENSG00000213574 |
| <b>LGALS3</b>    | 1606.14482 | 0.464059179  | 6.86372E-06 | ENSG00000131981 |
| <b>LIMA1</b>     | 3038.72204 | 0.211729378  | 0.029455826 | ENSG00000050405 |
| <b>LINC00511</b> | 596.648032 | 0.280642856  | 0.011624763 | ENSG00000227036 |
| <b>LMF2</b>      | 981.906922 | -0.229311586 | 0.035153695 | ENSG00000100258 |
| <b>LPP</b>       | 1197.9245  | 0.26713684   | 0.012377485 | ENSG00000145012 |
| <b>LTK</b>       | 382.19436  | 0.231620684  | 0.037381964 | ENSG00000062524 |
| <b>MCM2</b>      | 3691.6045  | -0.201265429 | 0.03694286  | ENSG00000073111 |
| <b>MCM3</b>      | 6174.61263 | -0.185315573 | 0.049846859 | ENSG00000112118 |
| <b>MCM4</b>      | 5619.3297  | -0.198772422 | 0.03301273  | ENSG00000104738 |

|                  |            |              |             |                 |
|------------------|------------|--------------|-------------|-----------------|
| <b>MED13L</b>    | 5225.65175 | 0.194441332  | 0.038337255 | ENSG00000123066 |
| <b>MID1</b>      | 3195.83089 | 0.397453862  | 4.62584E-05 | ENSG00000101871 |
| <b>MLPH</b>      | 1927.1131  | 0.232293767  | 0.023922346 | ENSG00000115648 |
| <b>MT1G</b>      | 313.839859 | 0.231708339  | 0.037280636 | ENSG00000125144 |
| <b>MT2A</b>      | 4596.17198 | 0.324540696  | 0.000594269 | ENSG00000125148 |
| <b>MTCO3P12</b>  | 15720.2806 | 0.24389268   | 0.006421804 | ENSG00000198744 |
| <b>MTUS1</b>     | 1688.05962 | 0.228135481  | 0.026881805 | ENSG00000129422 |
| <b>MYEOV</b>     | 3455.03849 | 0.224217226  | 0.022122473 | ENSG00000172927 |
| <b>MYOF</b>      | 14243.616  | 0.201045953  | 0.027357519 | ENSG00000138119 |
| <b>NCAPG2</b>    | 1490.01692 | -0.207076745 | 0.045682108 | ENSG00000146918 |
| <b>NDRG1</b>     | 2969.30105 | 0.324724545  | 0.000860687 | ENSG00000104419 |
| <b>NGFR</b>      | 325.583342 | 0.269895422  | 0.015441168 | ENSG00000064300 |
| <b>NPAS2</b>     | 544.062208 | 0.265718547  | 0.017699227 | ENSG00000170485 |
| <b>NPTN</b>      | 946.354944 | 0.214123093  | 0.047487458 | ENSG00000156642 |
| <b>NQO1</b>      | 5373.86721 | 0.405755776  | 1.47446E-05 | ENSG00000181019 |
| <b>NUP85</b>     | 2349.83045 | -0.214895386 | 0.032791494 | ENSG00000125450 |
| <b>NUSAP1</b>    | 1374.80358 | -0.209239124 | 0.04660435  | ENSG00000137804 |
| <b>OR51B4</b>    | 448.657817 | 0.308182647  | 0.005981971 | ENSG00000183251 |
| <b>OSGIN1</b>    | 634.817481 | 0.254190389  | 0.022510548 | ENSG00000140961 |
| <b>OTUB2</b>     | 368.217379 | 0.392204231  | 0.000454653 | ENSG00000089723 |
| <b>PAM</b>       | 3606.50061 | 0.21638714   | 0.024117499 | ENSG00000145730 |
| <b>PCLAF</b>     | 559.871692 | -0.22104183  | 0.047662877 | ENSG00000166803 |
| <b>PDLIM5</b>    | 2830.15734 | 0.195829374  | 0.045259246 | ENSG00000163110 |
| <b>PER2</b>      | 163.218515 | 0.261224339  | 0.011464355 | ENSG00000132326 |
| <b>PNN</b>       | 4450.05548 | -0.202040971 | 0.033390779 | ENSG00000100941 |
| <b>POLE</b>      | 3394.58564 | -0.197166136 | 0.045192495 | ENSG00000177084 |
| <b>PPIAP29</b>   | 75.9083929 | -0.485157062 | 0.000000007 | ENSG00000214975 |
| <b>RABGGTB</b>   | 2013.42251 | -0.216703188 | 0.03192614  | ENSG00000137955 |
| <b>RANBP1</b>    | 1852.04814 | -0.255038216 | 0.012023616 | ENSG00000099901 |
| <b>RNF128</b>    | 168.584917 | 0.239852253  | 0.021259165 | ENSG00000133135 |
| <b>RPL34</b>     | 4460.86115 | -0.201320036 | 0.035633711 | ENSG00000109475 |
| <b>RPL5P4</b>    | 42.4816015 | -0.227343704 | 0.00065862  | ENSG00000229994 |
| <b>RPS23</b>     | 4019.23236 | -0.227336628 | 0.023767614 | ENSG00000186468 |
| <b>RPS27AP16</b> | 3534.72097 | -0.231096045 | 0.019727652 | ENSG00000224631 |
| <b>RPS29</b>     | 4474.3423  | -0.259061353 | 0.008158282 | ENSG00000213741 |
| <b>RPS6KA2</b>   | 226.295931 | 0.304341601  | 0.003667454 | ENSG00000071242 |
| <b>RPSA</b>      | 4154.11797 | -0.277403214 | 0.003734191 |                 |
| <b>RRM1</b>      | 2456.79125 | -0.284560695 | 0.004156358 | ENSG00000167325 |
| <b>SECTM1</b>    | 529.907198 | 0.369123808  | 0.000955381 | ENSG00000141574 |
| <b>SH3BP4</b>    | 1568.61242 | 0.24950967   | 0.018066042 | ENSG00000130147 |
| <b>SH3KBP1</b>   | 1813.24675 | 0.213684426  | 0.038497203 | ENSG00000147010 |
| <b>SLC16A6</b>   | 121.126739 | 0.201147792  | 0.03997311  | ENSG00000108932 |
| <b>SLC2A1</b>    | 6167.59549 | 0.294675487  | 0.001584407 | ENSG00000117394 |
| <b>SLC37A2</b>   | 77.0629637 | 0.219361769  | 0.011711534 | ENSG00000134955 |
| <b>SLC39A11</b>  | 726.747305 | 0.226651691  | 0.040595181 | ENSG00000133195 |
| <b>SLC3A2</b>    | 8249.46266 | 0.310292274  | 0.000805144 | ENSG00000168003 |
| <b>SLC7A5</b>    | 13624.4039 | 0.323735834  | 0.000334664 | ENSG00000103257 |
| <b>SMAD3</b>     | 2625.60913 | 0.345543981  | 0.000506292 | ENSG00000166949 |
| <b>SMIM14</b>    | 257.261789 | 0.215990339  | 0.049473011 | ENSG00000163683 |
| <b>SNHG1</b>     | 5387.94725 | -0.199260323 | 0.033787959 | ENSG00000255717 |

|                 |            |              |             |                 |
|-----------------|------------|--------------|-------------|-----------------|
| <b>SNHG25</b>   | 150.436777 | -0.217940219 | 0.031762084 | ENSG00000266402 |
| <b>SNHG9</b>    | 534.118578 | -0.227590459 | 0.042317473 | ENSG00000255198 |
| <b>SNRPG</b>    | 605.311887 | -0.220747636 | 0.047073183 | ENSG00000143977 |
| <b>SOX9</b>     | 2149.535   | 0.250003085  | 0.014875191 | ENSG00000125398 |
| <b>SRSF1</b>    | 5638.93868 | -0.19119989  | 0.041665942 | ENSG00000136450 |
| <b>SSH1</b>     | 4842.92711 | 0.306130273  | 0.001194932 | ENSG00000084112 |
| <b>SUMO1P3</b>  | 62.8002729 | -0.21484975  | 0.003179657 | ENSG00000235082 |
| <b>TEF</b>      | 236.536659 | 0.305396122  | 0.004993677 | ENSG00000167074 |
| <b>TGFA</b>     | 1743.24663 | 0.239667746  | 0.018916938 | ENSG00000163235 |
| <b>THOC3</b>    | 355.803421 | -0.248067427 | 0.026585883 | ENSG00000051596 |
| <b>TIMM23B</b>  | 27.9068186 | -0.145820157 | 0.013440218 | ENSG00000204152 |
| <b>TIPARP</b>   | 864.015609 | 0.505235741  | 4.89519E-06 | ENSG00000163659 |
| <b>TLDC1</b>    | 1287.93974 | 0.31058647   | 0.003163448 | ENSG00000140950 |
| <b>TMEM2</b>    | 909.943339 | 0.217213992  | 0.045012772 | ENSG00000135048 |
| <b>TMEM200A</b> | 428.63253  | 0.260951785  | 0.01995854  | ENSG00000164484 |
| <b>TMEM221</b>  | 75.4495689 | 0.176376876  | 0.041593652 | ENSG00000188051 |
| <b>TOMM40</b>   | 2880.31969 | -0.204492532 | 0.037347492 | ENSG00000130204 |
| <b>TPM2</b>     | 7085.40699 | -0.212072887 | 0.024327693 | ENSG00000198467 |
| <b>TRIM2</b>    | 665.133329 | 0.341136626  | 0.002064531 | ENSG00000109654 |
| <b>TRIOBP</b>   | 808.807088 | 0.219404386  | 0.044688258 | ENSG00000100106 |
| <b>TSC22D1</b>  | 6699.60893 | 0.35883103   | 0.000324115 | ENSG00000102804 |
| <b>TSPAN18</b>  | 339.119595 | 0.21846273   | 0.046744187 | ENSG00000157570 |
| <b>TUBA1B</b>   | 2116.57294 | -0.239828003 | 0.01837716  | ENSG00000123416 |
| <b>TUBA1C</b>   | 1542.3865  | -0.203094852 | 0.049369336 | ENSG00000167553 |
| <b>TYMS</b>     | 1427.83029 | -0.231660138 | 0.026673775 | ENSG00000176890 |
| <b>UBE2C</b>    | 926.394729 | -0.248847799 | 0.022068283 | ENSG00000175063 |
| <b>UNC13A</b>   | 3245.49718 | 0.194700436  | 0.0442065   | ENSG00000130477 |
| <b>USP39</b>    | 1923.84998 | -0.218147507 | 0.031100452 | ENSG00000168883 |
| <b>WDR34</b>    | 1471.11155 | -0.22324974  | 0.034859573 | ENSG00000119333 |
| <b>WNT16</b>    | 475.172545 | 0.290349912  | 0.009566714 | ENSG00000002745 |
| <b>WNT9A</b>    | 672.65464  | 0.260004     | 0.018641762 | ENSG00000143816 |
| <b>ZFP36L1</b>  | 2953.26356 | 0.296502364  | 0.002346183 | ENSG00000185650 |
| <b>ZWINT</b>    | 1913.28877 | -0.245259449 | 0.015680565 | ENSG00000122952 |

---

Table S5

**Differentially expressed genes after STAG2 degradation (FDR < 0,05; log2 FC >0,6)**(Genes annotated in **bold red** are genes that respond to auxin (Rao et al., Cell, 2017))

| Gene name      | baseMean    | log2FoldChange | pvalue      | ENS Gene        |
|----------------|-------------|----------------|-------------|-----------------|
| AC015712.2     | 384.8367021 | 0.343536448    | 0.003846459 | ENSG00000259583 |
| AC026254.2     | 122.2613771 | 0.501084233    | 1.38642E-06 | ENSG00000239223 |
| AC040162.1     | 76.25874216 | -0.186694117   | 0.045375069 | ENSG00000132382 |
| AC073621.1     | 3563.864194 | -0.234192151   | 0.029087202 | ENSG00000178896 |
| AC106795.1     | 85.64286778 | -0.244098067   | 0.012887103 | ENSG00000183087 |
| ACTN4          | 12024.8453  | -0.226798952   | 0.027817609 | ENSG00000013375 |
| ADD3           | 663.1215888 | 0.27080804     | 0.021368274 | ENSG00000067167 |
| AGRN           | 2281.53145  | -0.237771088   | 0.040266694 | ENSG00000164362 |
| <b>AHRR</b>    | 411.5171477 | 0.613320808    | 0.00000025  | ENSG00000063438 |
| AL049714.1     | 43.27995222 | 0.277092103    | 0.000243308 | ENSG00000115548 |
| AL109741.2     | 28.09865026 | -0.156925872   | 0.021503845 | ENSG00000150961 |
| AL358472.1     | 15.89799953 | 0.11332353     | 0.032748936 | ENSG00000110047 |
| <b>ALDH1A3</b> | 4487.604962 | 0.372165531    | 0.000787307 | ENSG00000184254 |
| ALYREF         | 2637.710198 | -0.223946285   | 0.046348333 | ENSG00000099624 |
| AMOTL2         | 1290.77886  | -0.380629925   | 0.001156461 | ENSG00000187961 |
| ANKRD12        | 279.3924239 | 0.273362385    | 0.018955028 | ENSG00000099795 |
| AQP3           | 204.3853501 | 0.2734884      | 0.014623327 | ENSG00000165272 |
| ARHGEF37       | 332.5581374 | 0.304375561    | 0.010230253 | ENSG00000114019 |
| ASPSR1         | 728.5663998 | -0.238282752   | 0.043706312 | ENSG00000025770 |
| ATAD3B         | 1207.909712 | -0.247737829   | 0.031501388 | ENSG00000188157 |
| ATP5D          | 1232.25509  | -0.258024608   | 0.028864409 | ENSG00000198380 |
| AURKAIP1       | 1479.549143 | -0.226988725   | 0.047635975 | ENSG00000127586 |
| AURKB          | 748.1378103 | -0.278142864   | 0.018907323 | ENSG00000130702 |
| AXL            | 1925.996356 | -0.259044996   | 0.020607361 | ENSG00000176018 |
| CADPS2         | 267.1602114 | 0.28054561     | 0.016340993 | ENSG00000063660 |
| CAPN15         | 646.0101997 | -0.235655075   | 0.047522829 | ENSG00000231416 |
| CAV1           | 4663.658632 | -0.280171021   | 0.008840816 | ENSG00000105974 |
| CAVIN1         | 5760.066965 | -0.264975019   | 0.014541408 | ENSG00000034152 |
| CCDC186        | 612.6470283 | 0.262164935    | 0.026457333 | ENSG00000155304 |
| CD109          | 3137.602527 | 0.341677968    | 0.002433663 | ENSG00000156535 |
| CDK6           | 3741.178881 | 0.226896153    | 0.033585778 | ENSG00000105810 |
| CEP170B        | 2421.745841 | -0.235735064   | 0.040818566 | ENSG00000142627 |
| CGN            | 706.0781858 | -0.270723202   | 0.022196092 | ENSG00000125912 |
| CHTF18         | 1103.064818 | -0.25381691    | 0.029802969 | ENSG00000144369 |
| CKB            | 6217.640042 | -0.216102872   | 0.043918714 | ENSG00000186472 |
| CLUH           | 4172.653194 | -0.264729579   | 0.016553663 | ENSG00000166165 |
| COL18A1        | 1141.378117 | -0.233037828   | 0.04801685  | ENSG00000204634 |
| COL9A3         | 854.5258926 | -0.277186141   | 0.017783767 | ENSG00000183684 |
| CREBRF         | 111.1846609 | 0.210218014    | 0.044523028 | ENSG00000087077 |
| CYC1           | 4047.304583 | -0.233313079   | 0.028975619 | ENSG00000196878 |
| <b>CYP1A1</b>  | 207.8273184 | 0.650896061    | 1.4891E-08  | ENSG00000140465 |
| <b>CYP1B1</b>  | 135.8637742 | 0.426014603    | 8.67938E-05 | ENSG00000138061 |
| DDX51          | 982.8234669 | -0.27168034    | 0.018891634 | ENSG00000071794 |
| <b>DHRS3</b>   | 489.7517385 | 0.275410525    | 0.020394665 | ENSG00000162496 |



|                 |             |              |             |                 |
|-----------------|-------------|--------------|-------------|-----------------|
| <b>DISP1</b>    | 215.6501615 | 0.230447702  | 0.04592773  | ENSG00000140451 |
| <b>DPP7</b>     | 2305.715134 | -0.239246214 | 0.035816302 | ENSG00000186480 |
| <b>DUS3L</b>    | 610.2479378 | -0.259084161 | 0.028564112 | ENSG00000118515 |
| <b>EBNA1BP2</b> | 2612.082088 | -0.224574619 | 0.038584023 | ENSG00000179091 |
| <b>EEF1D</b>    | 6776.457067 | -0.243473236 | 0.025370621 | ENSG00000112144 |
| <b>EGFR</b>     | 2044.138496 | 0.250170814  | 0.023118884 | ENSG00000146648 |
| <b>EGR1</b>     | 2945.432344 | 0.256977408  | 0.019345745 | ENSG00000006459 |
| <b>EHD1</b>     | 1066.519573 | -0.266773626 | 0.023215396 | ENSG00000164463 |
| <b>EPHA2</b>    | 5812.818836 | -0.22277592  | 0.033675944 | ENSG00000130402 |
| <b>EXOSC4</b>   | 750.0340241 | -0.252137566 | 0.032286558 | ENSG00000162006 |
| <b>F3</b>       | 1074.564505 | -0.294334615 | 0.010257585 | ENSG00000184990 |
| <b>FAM102B</b>  | 301.0361861 | 0.287378005  | 0.0150974   | ENSG00000106366 |
| <b>FAM171B</b>  | 383.5676569 | 0.24258572   | 0.041435565 | ENSG00000132361 |
| <b>FGF9</b>     | 204.9016955 | 0.287919095  | 0.012124657 | ENSG00000102678 |
| <b>FGF9</b>     | 980.5573876 | 0.294500898  | 0.010600599 | ENSG00000179163 |
| <b>FGFBP1</b>   | 98.86684065 | 0.201133171  | 0.048073726 | ENSG00000183751 |
| <b>FLNC</b>     | 5341.900359 | -0.310100082 | 0.004829358 | ENSG00000137440 |
| <b>FOS</b>      | 2082.444442 | 0.401701411  | 0.000419404 | ENSG00000153234 |
| <b>GAL</b>      | 788.2632445 | -0.268459136 | 0.021611255 | ENSG00000069482 |
| <b>GAS6</b>     | 1097.599255 | -0.245019481 | 0.037790506 | ENSG00000138593 |
| <b>GDA</b>      | 1927.082242 | 0.45294776   | 4.22538E-05 | ENSG00000119125 |
| <b>GDF15</b>    | 6345.725409 | 0.219630837  | 0.039037869 | ENSG00000130513 |
| <b>GFPT1</b>    | 1750.15019  | 0.227677668  | 0.041725319 | ENSG00000228399 |
| <b>GJB3</b>     | 716.7578616 | -0.277188612 | 0.019634363 | ENSG00000086544 |
| <b>GPC1</b>     | 2261.663728 | -0.289576574 | 0.008359392 | ENSG00000175756 |
| <b>GULP1</b>    | 671.7906819 | 0.256602572  | 0.02927724  | ENSG00000177469 |
| <b>H1FO</b>     | 5305.533346 | 0.242777375  | 0.025572273 | ENSG00000189060 |
| <b>H2AFX</b>    | 1239.53394  | -0.236993874 | 0.041817481 | ENSG00000127666 |
| <b>HAS3</b>     | 1112.561461 | 0.515914842  | 8.25834E-06 | ENSG00000103044 |
| <b>HAT1</b>     | 1012.52403  | 0.269161528  | 0.02013686  | ENSG00000177700 |
| <b>HIPK2</b>    | 1882.110089 | 0.253191977  | 0.023429218 | ENSG00000064393 |
| <b>HLTF</b>     | 981.9837767 | 0.231061377  | 0.045918587 | ENSG00000128708 |
| <b>HPCAL1</b>   | 1088.530876 | 0.252071067  | 0.028906441 | ENSG00000115756 |
| <b>HSPA13</b>   | 715.5878159 | 0.288654747  | 0.014045111 | ENSG00000175793 |
| <b>ICK</b>      | 295.1385933 | 0.246247733  | 0.037120649 | ENSG00000135480 |
| <b>IDH1</b>     | 1200.981012 | 0.228791114  | 0.044380748 | ENSG00000167601 |
| <b>IL6ST</b>    | 477.3367111 | 0.314802296  | 0.008140836 | ENSG00000244535 |
| <b>INF2</b>     | 1492.338932 | -0.238688038 | 0.03862448  | ENSG00000176978 |
| <b>INSIG1</b>   | 728.3856007 | 0.245477444  | 0.036286497 | ENSG00000165684 |
| <b>INTS8</b>    | 962.2908645 | 0.238296553  | 0.041197772 | ENSG00000196756 |
| <b>ISYNA1</b>   | 2709.390161 | -0.217193478 | 0.048261711 | ENSG00000167755 |
| <b>ITPKC</b>    | 538.341544  | -0.2368878   | 0.046388887 | ENSG00000128626 |
| <b>ITPR1</b>    | 324.2172668 | 0.30954599   | 0.009016786 | ENSG00000150995 |
| <b>ITPR2</b>    | 345.9874576 | 0.276300912  | 0.019854484 | ENSG00000117525 |
| <b>KDM3A</b>    | 1034.265164 | 0.299562994  | 0.009732671 | ENSG00000198918 |
| <b>KDM7A</b>    | 452.5775543 | 0.291407766  | 0.01423637  | ENSG00000152558 |
| <b>KIAA1683</b> | 176.1416106 | 0.262822415  | 0.020026857 | ENSG00000130518 |
| <b>KLHL17</b>   | 1082.713    | -0.230375834 | 0.048685769 | ENSG00000166166 |
| <b>KLK6</b>     | 673.1270016 | -0.263709391 | 0.025402083 | ENSG00000169696 |
| <b>KRT7</b>     | 289.5259415 | -0.280506998 | 0.015448656 | ENSG00000177707 |

|           |             |              |             |                 |
|-----------|-------------|--------------|-------------|-----------------|
| KRT8      | 38619.73064 | -0.216112054 | 0.040117001 | ENSG00000109680 |
| LAMA5     | 6063.177906 | -0.209582077 | 0.046868698 | ENSG00000070814 |
| LAMB3     | 2022.157194 | -0.236393924 | 0.032095645 | ENSG00000114767 |
| LGALS3    | 1149.289095 | 0.238376356  | 0.038969489 | ENSG00000131981 |
| LINC00511 | 593.406884  | 0.249583433  | 0.03522631  | ENSG00000227036 |
| LPP       | 1315.656376 | 0.254391796  | 0.024673182 | ENSG00000145012 |
| LYSMD3    | 353.8116475 | 0.240631739  | 0.042833246 | ENSG00000006062 |
| MAN2A1    | 827.493203  | 0.261093879  | 0.026215756 | ENSG00000125731 |
| MAP2K3    | 2742.910921 | -0.227234177 | 0.04415226  | ENSG00000169750 |
| MAP3K14   | 366.7247578 | -0.280866518 | 0.017959409 | ENSG00000099994 |
| MID1      | 3453.768669 | 0.260377991  | 0.016585339 | ENSG00000101871 |
| MRPL45P2  | 171.8077608 | -0.27296757  | 0.014219748 | ENSG00000154309 |
| MRPS12    | 1444.475199 | -0.245245492 | 0.033917484 | ENSG00000117395 |
| MSLNL     | 122.3519433 | -0.216989116 | 0.041262123 | ENSG00000104529 |
| MYBBP1A   | 2937.990729 | -0.247572379 | 0.024626946 | ENSG00000170421 |
| MYOF      | 15526.78597 | 0.305241035  | 0.003946188 | ENSG00000138119 |
| NCAPD2    | 3273.818249 | -0.225217483 | 0.03766847  | ENSG00000215030 |
| NCAPH2    | 1149.808233 | -0.246719737 | 0.035197268 | ENSG00000160551 |
| NCLN      | 2895.799697 | -0.226353639 | 0.045575982 | ENSG00000144366 |
| NCOA7     | 254.7815986 | 0.232012485  | 0.046950973 | ENSG00000123104 |
| NDRG1     | 3413.449341 | 0.238381116  | 0.027756228 | ENSG00000104419 |
| NDUFB7    | 862.7152708 | -0.297873643 | 0.010896228 | ENSG00000168268 |
| NECTIN3   | 2423.464888 | 0.216455261  | 0.047070608 | ENSG00000143375 |
| NQO1      | 12579.85348 | 0.413677653  | 5.88011E-05 | ENSG00000181019 |
| NR1D2     | 819.7187178 | 0.260829779  | 0.026441788 | ENSG00000228782 |
| NR4A2     | 1977.967525 | 0.438077753  | 0.000117802 | ENSG00000198959 |
| NT5DC2    | 2015.58192  | -0.218213362 | 0.047792317 | ENSG00000112893 |
| OR51B4    | 531.1102715 | 0.310343401  | 0.008919742 | ENSG00000183251 |
| PCLO      | 296.3343675 | 0.263676181  | 0.02527627  | ENSG00000230837 |
| PER2      | 156.1994998 | 0.230160941  | 0.038591881 | ENSG00000132326 |
| PGM3      | 1014.781984 | 0.25283608   | 0.029655782 | ENSG00000162636 |
| PIDD1     | 1080.740111 | -0.310881331 | 0.008269146 | ENSG00000105655 |
| PIF1      | 252.3583    | -0.266261395 | 0.020524855 | ENSG00000138413 |
| PJA2      | 993.1522887 | 0.267140243  | 0.021774063 | ENSG00000170089 |
| POLR2L    | 1961.234912 | -0.286968381 | 0.01221301  | ENSG00000111961 |
| PTPN12    | 1412.660759 | 0.283475013  | 0.012992089 | ENSG00000177595 |
| PTPN23    | 1226.787425 | -0.247758442 | 0.029906623 | ENSG00000099814 |
| RAC3      | 1656.880499 | -0.248901749 | 0.030420278 | ENSG00000197747 |
| RBM14     | 1727.665015 | -0.222285957 | 0.047258258 | ENSG00000165813 |
| RHOT2     | 1005.553894 | -0.231050831 | 0.048861633 | ENSG00000160072 |
| RPL31P2   | 334.2277484 | 0.292607259  | 0.013579113 | ENSG00000128591 |
| RPL39     | 746.4029417 | 0.267099558  | 0.002959655 | ENSG00000127947 |
| RRP9      | 1254.078217 | -0.244004533 | 0.033683822 | ENSG00000010292 |
| S100A10   | 2877.881437 | -0.220834091 | 0.041095855 | ENSG00000174738 |
| SASH1     | 396.5967944 | 0.235952815  | 0.047307752 | ENSG00000178999 |
| SAT1      | 2914.622724 | 0.218978105  | 0.043373425 | ENSG00000151229 |
| SCRIB     | 3168.339067 | -0.280010073 | 0.013272722 | ENSG00000111912 |
| SEC24D    | 1025.079561 | 0.263857273  | 0.023441518 | ENSG00000180900 |
| SECISBP2L | 912.3232579 | 0.24173657   | 0.03818116  | ENSG00000092758 |
| SERPINE1  | 1480.843364 | -0.2997523   | 0.007840159 | ENSG00000182871 |

|                |             |              |             |                 |
|----------------|-------------|--------------|-------------|-----------------|
| <b>SESN3</b>   | 123.0361905 | 0.221517343  | 0.03664887  | ENSG00000198961 |
| <b>SFN</b>     | 9214.206238 | -0.28127354  | 0.007010089 | ENSG00000239306 |
| <b>SGK1</b>    | 234.7396969 | 0.233243332  | 0.043221827 | ENSG00000120738 |
| <b>SH2D3A</b>  | 1053.416342 | -0.288006267 | 0.01417384  | ENSG00000103326 |
| <b>SIVA1</b>   | 1159.492457 | -0.230004723 | 0.047783612 | ENSG00000106688 |
| <b>SLC1A1</b>  | 178.5993237 | 0.237069543  | 0.030704792 | ENSG00000185163 |
| <b>SLC2A13</b> | 113.6254193 | 0.237956624  | 0.021975258 | ENSG00000176014 |
| <b>SLC3A2</b>  | 9305.865437 | 0.238024255  | 0.02207227  | ENSG00000168003 |
| <b>SMCHD1</b>  | 1509.041118 | 0.276336347  | 0.018860998 | ENSG00000183111 |
| <b>SNAPC4</b>  | 1294.6233   | -0.275097406 | 0.015865243 | ENSG00000116266 |
| <b>SNHG17</b>  | 1099.592109 | -0.270046867 | 0.01837095  | ENSG00000261884 |
| <b>STXBP3</b>  | 477.716723  | 0.237319308  | 0.04601972  | ENSG00000101596 |
| <b>SUSD2</b>   | 222.2641519 | -0.227153705 | 0.047190006 | ENSG00000076201 |
| <b>TAOK1</b>   | 2301.836082 | 0.232506087  | 0.0400913   | ENSG00000188910 |
| <b>TBC1D19</b> | 99.03038513 | 0.227758958  | 0.025353386 | ENSG00000148700 |
| <b>TBC1D8</b>  | 1122.634323 | 0.24498009   | 0.032083011 | ENSG00000081803 |
| <b>TBL3</b>    | 1213.473172 | -0.262769071 | 0.023033875 | ENSG00000169764 |
| <b>TCOF1</b>   | 3392.883745 | -0.243251119 | 0.02499493  | ENSG00000149212 |
| <b>TERT</b>    | 240.4919471 | -0.245402926 | 0.034894581 | ENSG00000203485 |
| <b>TGM2</b>    | 1809.073465 | -0.453533862 | 7.00679E-05 | ENSG00000140983 |
| <b>TICAM1</b>  | 669.0536322 | -0.249960408 | 0.034604723 | ENSG00000164941 |
| <b>TIPARP</b>  | 957.0454751 | 0.429603366  | 0.000219342 | ENSG00000163659 |
| <b>TMEM123</b> | 1984.87583  | 0.309688406  | 0.00524705  | ENSG00000170345 |
| <b>TOMM40</b>  | 2500.045643 | -0.239441188 | 0.031464074 | ENSG00000130204 |
| <b>TPM2</b>    | 6939.431946 | -0.245223449 | 0.024744808 | ENSG00000198467 |
| <b>TRAM1</b>   | 1878.899316 | 0.285449218  | 0.011926022 | ENSG00000134352 |
| <b>TRIM2</b>   | 968.8913394 | 0.486572969  | 2.84237E-05 | ENSG00000109654 |
| <b>TRIP6</b>   | 2179.832996 | -0.258026511 | 0.022953363 | ENSG00000188486 |
| <b>TRMT61A</b> | 596.5524084 | -0.256795292 | 0.030794077 | ENSG00000188229 |
| <b>TSC22D1</b> | 4217.883338 | 0.244379772  | 0.025030908 | ENSG00000102804 |
| <b>TUBB4B</b>  | 7007.135157 | -0.223535862 | 0.04149241  | ENSG00000141994 |
| <b>TUBB6</b>   | 2399.494472 | -0.263347078 | 0.018488506 | ENSG00000130066 |
| <b>UBE2C</b>   | 1080.816529 | -0.303345574 | 0.009324256 | ENSG00000175063 |
| <b>UGP2</b>    | 920.1915504 | 0.233723922  | 0.043330412 | ENSG00000101745 |

---

Table S6 Sequencing data information and statistics

Hi-C

| Cells     | Treatment | Dataset          | Sequenced Read |                     |                   | Alignable<br>(Normal+Chimeric) |                     | Library Complexity |                      |                   | Short Range         |                    |                    |
|-----------|-----------|------------------|----------------|---------------------|-------------------|--------------------------------|---------------------|--------------------|----------------------|-------------------|---------------------|--------------------|--------------------|
|           |           |                  | Pairs          | Normal Paired       | Unmapped          | Paired                         | Unique Reads        | Estimate           | Intra-fragment Reads | Inter-chromosomal | Intra-chromosomal   | <20Kb              | Long Range (>20Kb) |
| STAG1_AID | auxin     | stag1_aux_rep1   | 352,994,678    | 322,385,709(91.33%) | 13,955,867(3.95%) | 336,688,713(95.38%)            | 164,271,072(46.54%) | 207,871,658        | 17,860,572(5.06%)    | 9,536,751(5.81%)  | 100,480,463(61.17%) | 68,057,666(41.43%) | 32,422,769(19.74%) |
| STAG1_AID | auxin     | stag1_aux_rep2   | 215,759,247    | 196,841,455(91.23%) | 6,834,689(3.17%)  | 207,256,497(96.06%)            | 109,571,715(50.78%) | 149,913,627        | 16,586,886(7.69%)    | 6,794,151(6.20%)  | 63,715,203(58.15%)  | 43,417,875(39.63%) | 20,297,309(18.52%) |
| STAG1_AID | no auxin  | stag1_noaux_rep1 | 363,651,225    | 333,836,040(91.80%) | 8,807,329(2.42%)  | 352,094,713(96.82%)            | 174,183,400(47.90%) | 222,500,495        | 19,280,520(5.30%)    | 11,245,633(6.46%) | 106,628,783(61.22%) | 71,549,517(41.08%) | 35,079,249(20.14%) |
| STAG1_AID | no auxin  | stag1_noaux_rep2 | 380,260,326    | 348,097,881(91.54%) | 11,585,821(3.05%) | 365,808,354(96.20%)            | 155,783,014(40.97%) | 183,483,536        | 22,743,860(5.98%)    | 9,864,411(6.33%)  | 87,993,350(56.48%)  | 59,146,464(37.97%) | 28,846,856(18.52%) |
| STAG2_AID | auxin     | stag2_aux_rep1   | 378,077,127    | 344,605,760(91.15%) | 6,368,203(1.68%)  | 368,228,345(97.40%)            | 205,334,680(54.31%) | 284,878,723        | 18,069,417(4.78%)    | 11,924,177(5.81%) | 132,780,473(64.67%) | 78,537,903(38.25%) | 54,242,544(26.42%) |
| STAG2_AID | auxin     | stag2_aux_rep2   | 385,014,233    | 355,012,350(92.21%) | 8,912,766(2.31%)  | 373,400,409(96.98%)            | 127,096,003(33.01%) | 137,472,572        | 18,162,705(4.72%)    | 6,367,264(5.01%)  | 71,820,988(56.51%)  | 47,690,173(37.52%) | 24,130,803(18.99%) |
| STAG2_AID | no auxin  | stag2_noaux_rep1 | 380,231,188    | 345,070,798(90.75%) | 7,914,191(2.08%)  | 368,760,699(96.98%)            | 211,005,691(55.49%) | 300,668,566        | 17,309,360(4.55%)    | 12,363,478(5.86%) | 137,362,490(65.10%) | 77,541,310(36.75%) | 59,821,156(28.35%) |
| STAG2_AID | no auxin  | stag2_noaux_rep2 | 389,138,689    | 358,436,903(92.11%) | 8,628,365(2.22%)  | 377,683,900(97.06%)            | 119,566,816(30.73%) | 127,034,528        | 15,366,801(3.95%)    | 5,689,490(4.76%)  | 68,355,153(57.17%)  | 46,097,311(38.55%) | 22,257,823(18.62%) |

CHIP-seq

| Cells     | Antibody | Sample                              | Merged files       | Total Reads | Mapped Reads |
|-----------|----------|-------------------------------------|--------------------|-------------|--------------|
| STAG1_AID | EGFP     | I17-1418-05-SA1-AID_127_EGFP_rep1   | SA1-               | 27008128    | 20922666     |
| STAG1_AID | EGFP     | I18-1093-02-SA1-AID_127_EGFP_rep2   | AID_127_EGFP_mrg   |             |              |
| STAG1_AID |          | I17-1418-04-SA1-AID_127_input       |                    | 6610798     | 5330750      |
| STAG2_AID | EGFP     | I17-1418-02-SA2-AID_3B9_5_EGFP_rep1 | SA2-               | 25856287    | 19917173     |
| STAG2_AID | EGFP     | I18-1093-05-SA2-AID_3B9_5_EGFP_rep2 | AID_3B9_5_EGFP_mrg |             |              |
| STAG2_AID |          | I17-1418-01-SA2-AID_3B9_5_input     |                    | 9142350     | 7158571      |

RNA-seq

| Cells     | Treatment | Sample                          | Total Reads | Mapped Reads |
|-----------|-----------|---------------------------------|-------------|--------------|
| STAG1_AID | no auxin  | I17-1387-08-SA1-AID_69_noaux    | 28069691    | 27425144     |
| STAG1_AID | auxin     | I17-1387-07-SA1-AID_69_aux      | 28740294    | 28133107     |
| STAG1_AID | no auxin  | I17-1394-02-SA1-AID_130_noaux   | 30126480    | 29384142     |
| STAG1_AID | auxin     | I17-1394-01-SA1-AID_130_aux     | 26577796    | 25993987     |
| STAG2_AID | no auxin  | I17-1387-02-SA2-AID_3B9_5_noaux | 31992932    | 31309222     |
| STAG2_AID | auxin     | I17-1387-01-SA2-AID_3B9_5_aux   | 28202355    | 27565400     |
| STAG2_AID | no auxin  | I17-1387-04-SA2-AID_3B9_3_noaux | 26269941    | 25688596     |
| STAG2_AID | auxin     | I17-1387-03-SA2-AID_3B9_3_aux.  | 28685801    | 28053320     |

**Table S7**

**Peak statistics**

| Feature  |          | Characteristics |         |         | Distribution of peaks (%) |                |                |
|----------|----------|-----------------|---------|---------|---------------------------|----------------|----------------|
|          |          |                 |         |         | Common peaks              | SA1-only peaks | SA2-only peaks |
| Promoter | active   | TSS             | H3K4me3 | H3K27Ac | 9.5                       | 8.0            | 32.6           |
|          | inactive | TSS             | H3K4me3 |         | 0.3                       | 0.2            | 7.0            |
| Enhancer | active   | no promoter     | H3K4me1 | H3K27Ac | 15.4                      | 14.9           | 12.1           |
|          | inactive | no promoter     | H3K4me1 |         | 10.7                      | 9.2            | 6.9            |
| Others   |          |                 |         |         | 64.1                      | 67.7           | 41.4           |

**Table S8****Published datasets used in this study**

| <b>Data Type</b>                         | <b>Reference</b>      | <b>Website</b>                                                                                                                            |
|------------------------------------------|-----------------------|-------------------------------------------------------------------------------------------------------------------------------------------|
| RAD21 ChIP-seq                           | Rao et al., 2017      | <a href="https://www.ncbi.nlm.nih.gov/geo/query/acc.cgi?acc=GSM2809609">https://www.ncbi.nlm.nih.gov/geo/query/acc.cgi?acc=GSM2809609</a> |
| CTCF ChIP-seq                            | Rao et al., 2017      | <a href="https://www.ncbi.nlm.nih.gov/geo/query/acc.cgi?acc=GSM2809615">https://www.ncbi.nlm.nih.gov/geo/query/acc.cgi?acc=GSM2809615</a> |
| Input ChIP-seq for RAD21 and CTCF        | Rao et al., 2017      | <a href="https://www.ncbi.nlm.nih.gov/geo/query/acc.cgi?acc=GSM3242976">https://www.ncbi.nlm.nih.gov/geo/query/acc.cgi?acc=GSM3242976</a> |
| USF1 ChIP-seq                            | Davis CA et al., 2018 | <a href="https://www.encodeproject.org/experiments/ENCSR000BVK/">https://www.encodeproject.org/experiments/ENCSR000BVK/</a>               |
| FOSL1 ChIP-seq                           | Davis CA et al., 2018 | <a href="https://www.encodeproject.org/experiments/ENCSR000BTE/">https://www.encodeproject.org/experiments/ENCSR000BTE/</a>               |
| CEBPB ChIP-seq                           | Davis CA et al., 2018 | <a href="https://www.encodeproject.org/experiments/ENCSR000BSD/">https://www.encodeproject.org/experiments/ENCSR000BSD/</a>               |
| Input ChIP-seq for USF1, FOSL1 and CEBPB | Davis CA et al., 2018 | <a href="https://www.encodeproject.org/experiments/ENCSR000BMK/">https://www.encodeproject.org/experiments/ENCSR000BMK/</a>               |
| TCF7L2 ChIP-seq                          | Davis CA et al., 2018 | <a href="https://www.encodeproject.org/experiments/ENCSR000EUV/">https://www.encodeproject.org/experiments/ENCSR000EUV/</a>               |
| Input ChIP-seq for TCF7L2                | Davis CA et al., 2018 | <a href="https://www.encodeproject.org/experiments/ENCSR000EUX/">https://www.encodeproject.org/experiments/ENCSR000EUX/</a>               |
| H2A.Z ChIP-seq                           | Davis CA et al., 2018 | <a href="https://www.encodeproject.org/experiments/ENCSR227XNT/">https://www.encodeproject.org/experiments/ENCSR227XNT/</a>               |
| H3K4me1 ChIP-seq                         | Davis CA et al., 2018 | <a href="https://www.encodeproject.org/experiments/ENCSR161MXP/">https://www.encodeproject.org/experiments/ENCSR161MXP/</a>               |
| Input ChIP-seq for H2A.Z and HeK4me1     | Davis CA et al., 2018 | <a href="https://www.encodeproject.org/experiments/ENCSR198WIH/">https://www.encodeproject.org/experiments/ENCSR198WIH/</a>               |
| H3K4me3 ChIP-seq                         | Davis CA et al., 2018 | <a href="https://www.encodeproject.org/experiments/ENCSR000DTQ/">https://www.encodeproject.org/experiments/ENCSR000DTQ/</a>               |
| Input ChIP-seq for H3K4me3               | Davis CA et al., 2018 | <a href="https://www.encodeproject.org/experiments/ENCSR000DTP/">https://www.encodeproject.org/experiments/ENCSR000DTP/</a>               |
| STAG1 MCF10A ChIP-seq                    | Kojic et al.,2018     | <a href="https://www.ncbi.nlm.nih.gov/geo/query/acc.cgi?acc=GSM2718667">https://www.ncbi.nlm.nih.gov/geo/query/acc.cgi?acc=GSM2718667</a> |
| STAG2 MCF10A ChIP-seq                    | Kojic et al.,2018     | <a href="https://www.ncbi.nlm.nih.gov/geo/query/acc.cgi?acc=GSM2718668">https://www.ncbi.nlm.nih.gov/geo/query/acc.cgi?acc=GSM2718668</a> |
| Input MCF10A ChIP-seq                    | Kojic et al.,2018     | <a href="https://www.ncbi.nlm.nih.gov/geo/query/acc.cgi?acc=GSM2718671">https://www.ncbi.nlm.nih.gov/geo/query/acc.cgi?acc=GSM2718671</a> |

Rao et al., 2017

Rao SSP, Huang SC, Glenn St Hilaire B, Engreitz JM et al.  
Cohesin Loss Eliminates All Loop Domains. Cell 2017 Oct 5;171(2):305-320.e24. PMID: 28985562

Davis CA et al., 2018

Davis CA et al. The Encyclopedia of DNA elements (ENCODE): data portal update.  
Nucleic Acids Res 2018. Jan 4;46(D1):D794-D801. PMID: 29126249

Kojic et al.,2018

Kojic A et al. Distinct roles of cohesin-SA1 and cohesin-SA2 in 3D chromosome organization  
Nat Struct Mol Biol 2018 Jun;25(6):496-504. PMID: 29867216

**Table S9****Published Softwares**

| <b>Software</b>   | <b>Reference</b>                        | <b>Website</b>                                                                                                                                                      |
|-------------------|-----------------------------------------|---------------------------------------------------------------------------------------------------------------------------------------------------------------------|
| BEDTools v2.27    | Quinland and Hall, 2010                 | <a href="https://github.com/arq5x/bedtools2/releases">https://github.com/arq5x/bedtools2/releases</a>                                                               |
| Bowtie            | Langmead et al., 2009                   | <a href="http://bowtie-bio.sourceforge.net/index.shtml">http://bowtie-bio.sourceforge.net/index.shtml</a>                                                           |
| deepTools v3.1.3  | Ramírez et al., 2014                    | <a href="https://github.com/deeptools/deepTools/blob/develop/docs/content/about.rst">https://github.com/deeptools/deepTools/blob/develop/docs/content/about.rst</a> |
| DESeq2            | Love et al., 2014                       | <a href="http://bioconductor.org/packages/release/bioc/html/DESeq2.html">http://bioconductor.org/packages/release/bioc/html/DESeq2.html</a>                         |
| Fit-Hi-C v2.0.7   | Ay et al., 2014                         | <a href="https://github.com/ay-lab/fithic">https://github.com/ay-lab/fithic</a>                                                                                     |
| TADtool v.0.81    | Kruse et al. 2016                       | <a href="https://github.com/vaquerizaslab/tadtool">https://github.com/vaquerizaslab/tadtool</a>                                                                     |
| Juicebox          | Durand et al., 2016b                    | <a href="https://github.com/theaidenlab/juicer/wiki">https://github.com/theaidenlab/juicer/wiki</a>                                                                 |
| JUICER            | Durand et al., 2016a                    | <a href="https://github.com/theaidenlab/juicer/wiki">https://github.com/theaidenlab/juicer/wiki</a>                                                                 |
| MACS2.0           | Liu, 2014                               | <a href="https://github.com/taoliu/MACS">https://github.com/taoliu/MACS</a>                                                                                         |
| Python v2.7.15rc1 | Python Core Team., 2018                 | <a href="https://www.python.org/">https://www.python.org/</a>                                                                                                       |
| R v3.4.4          | R Core Team., 2018                      | <a href="https://www.r-project.org/">https://www.r-project.org/</a>                                                                                                 |
| RGT v0.12.1       | Gusmao et al., 2016; Lin Q et al., 2015 | <a href="https://pypi.org/project/RGT/">https://pypi.org/project/RGT/</a>                                                                                           |
| STAR              | Dobin et al., 2013                      | <a href="https://github.com/alexdobin/STAR">https://github.com/alexdobin/STAR</a>                                                                                   |

Ay et al., 2014

Ay F et al. (2014) Statistical confidence estimation for Hi-C data reveals regulatory chromatin contacts. *Genome Research*. 24(6):999-1011.

Dobin et al. 2013

Dobin A et al.(2013) STAR: ultrafast universal RNA-seq aligner. *Bioinformatics*, Jan; 29(1): 15–21.

Durand et al., 2016a

Durand NC et al. (2016) Juicer provides a one-click system for analyzing loop-resolution Hi-C experiments. *Cell Syst*, 3:95-98

Durand et al., 2016b

Durand NC et al. (2016) Juicebox provides a visualization system for Hi-C contact maps with unlimited zoom. *Cell Syst*, 3:99-101

Gusmao et al., 2016

Gusmao EG et al. (2016) Analysis of computational footprinting methods for DNase sequencing experiments. *Nat Methods*. 13(4):303-9.

Kruse et al. 2016

Kruse et al. (2016). TADtool: visual parameter identification for TAD-calling algorithms. *Bioinformatics*. 2016 Oct 15;32(20):3190-3192. Epub 2016 Jun 17.

Lin Q et al., 2015

Lin Q et al., 2015. Epigenetic program and transcription factor circuitry of dendritic cell development. *Nucleic Acids Res*. 2015 Nov 16;43(20):9680-93

Langmead et al., 2009

Langmead B et al. (2009) Ultrafast and memory-efficient alignment of short DNA sequences to the human genome. *Genome Biol* 10: R25.

Liu, 2014

Liu T (2014) Use model-based Analysis of ChIP-Seq (MACS) to analyze short reads generated by sequencing protein-DNA interactions in embryonic stem cells. *Methods Mol. Biol*, 1150, 81-95

Love et al., 2014

Love MI et al. (2014) Moderated estimation of fold change and dispersion for RNA-seq data with DESeq2. *Genome Biology*, 15, 550

Python Core Team, 2018

Python Core Team (2018). Python: A dynamic, open source programming language. Python Software Foundation.

Quinland and Hall, 2010

Quinland AR and Hall IM. (2010) BEDTools: a flexible suite of utilities for comparing genomic features. *Bioinformatics*, 26(6):841-842

R Core Team, 2018

R Core Team (2018). R: A language and environment for statistical computing. R Foundation for Statistical Computing, Vienna, Austria.

Ramirez et al, 2014

Ramirez F et al. (2014). deepTools: a flexible platform for exploring deep-sequencing data. *Nucleic Acids Res* 42: W187-191.
